# Supplementary material for: Novel Magnetic Nanocomposites Based on Carboxyl-Functionalized SBA-15 Silica for Effective Dye Adsorption from Aqueous Solutions
Source: MDPI journal article supplement (doi:10.3390/nano12132247), 2022-06-29
Supplement: s1 [file s1]

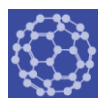

## Supplementary Materials

# Novel Magnetic Nanocomposites Based on Carboxyl-Functionalized SBA-15 Silica for Effective Dye Adsorption from Aqueous Solutions

Claudia Maria Simonescu <sup>1</sup>, Daniela Cristina Culita <sup>2,\*</sup>, Alina Tatarus <sup>1</sup>, Teodora Mocanu <sup>2</sup>, Gabriela Marinescu <sup>2</sup>, Raul Augustin Mitran <sup>2</sup>, Irina Atkinson <sup>2</sup>, Andrei Kuncser <sup>3</sup> and Nicolae Stanica <sup>2</sup>

<sup>1</sup> Faculty of Chemical Engineering and Biotechnologies, Politehnica University of Bucharest, Polizu Street, No.1-7, 011061 Bucharest, Romania; claudia.simonescu@upb.ro (C.M.S.); alina.tatarus@yahoo.com (A.T.)

<sup>2</sup> Ilie Murgulescu Institute of Physical Chemistry, Romanian Academy, 202 Splaiul Independentei, 060021 Bucharest, Romania; tmocanu@icf.ro (T.M.); gmarinescu@icf.ro (G.M.); rmitran@icf.ro (R.A.M.); iatkinson@icf.ro (I.A.); nstanica@icf.ro (N.S.)

<sup>3</sup> National Institute of Materials Physics, Atomistilor Street No. 405 A, 077125 Magurele, Romania; andrei.kuncser@infim.ro

\* Correspondence: dculita@icf.ro or danaculita@yahoo.co.uk; Tel.: +40-213167912

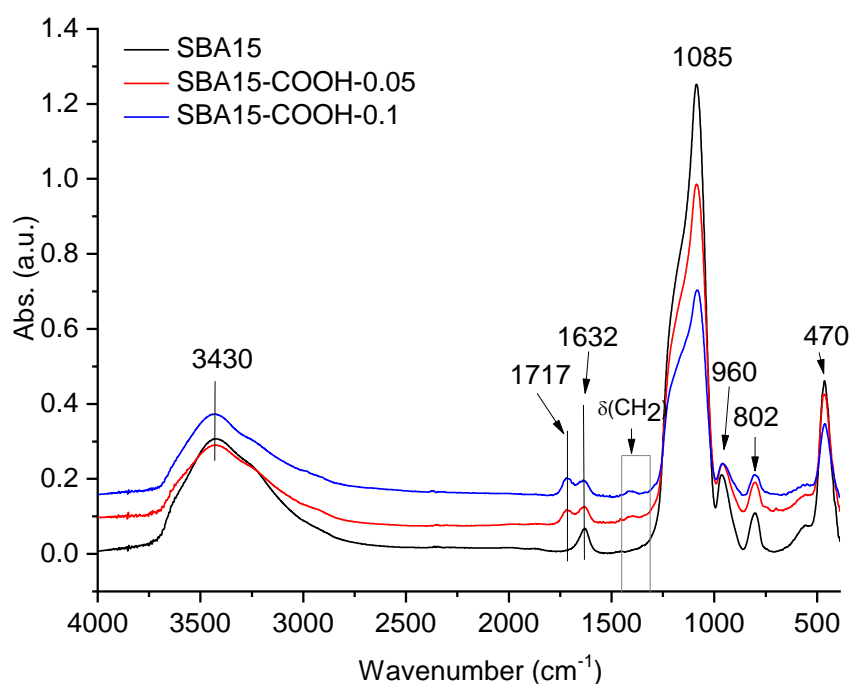

Figure S1. FTIR spectra of SBA15, SBA15-COOH-0.05 and SBA15-COOH-0.1.

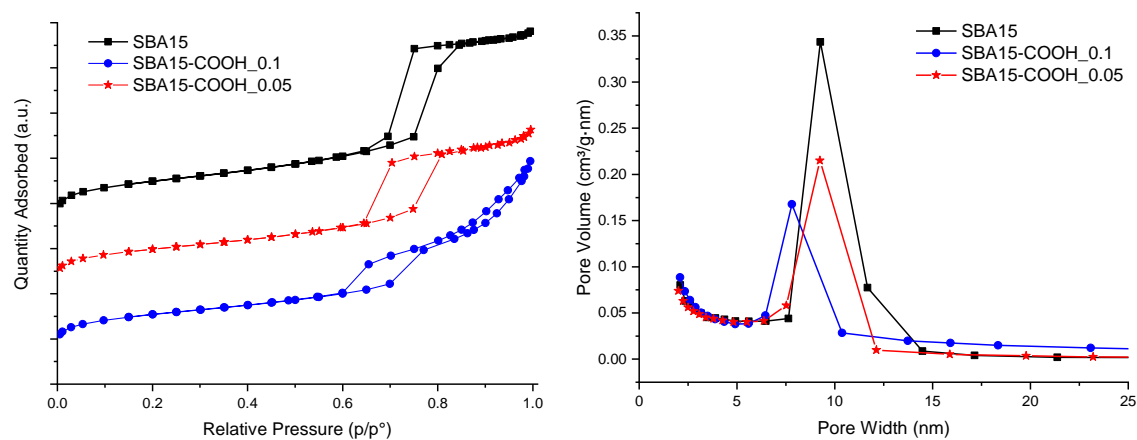

**Figure S2.** Nitrogen adsorption-desorption isotherms (left) and pore size distribution curves (right) of SBA15, SBA15-COOH-0.05, and SBA15-COOH-0.1.

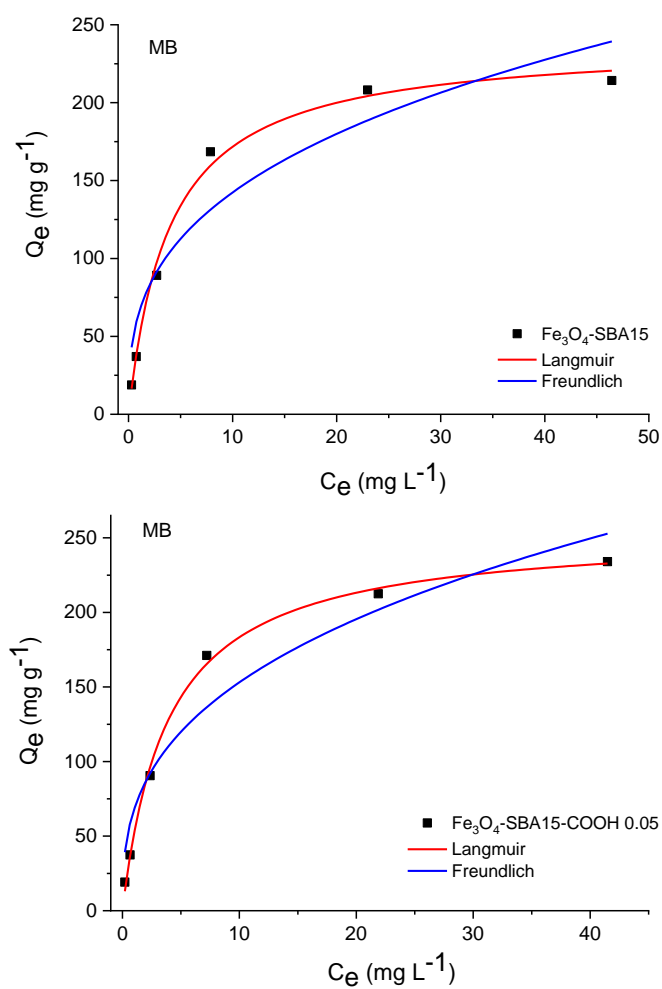

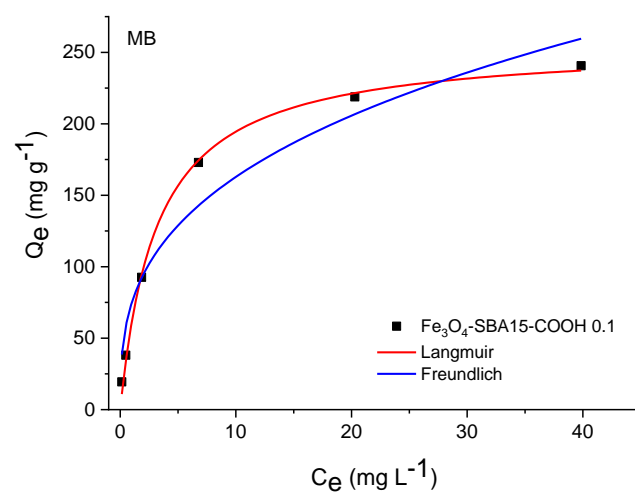

**Figure S3.** Equilibrium adsorption isotherms of MB on the magnetic adsorbents at pH = 10.6 and 298 K.

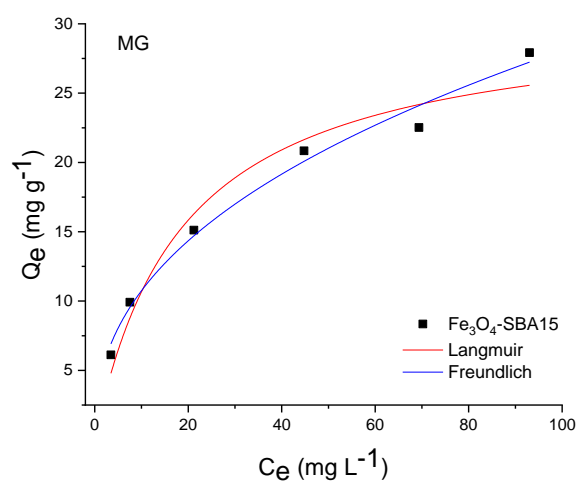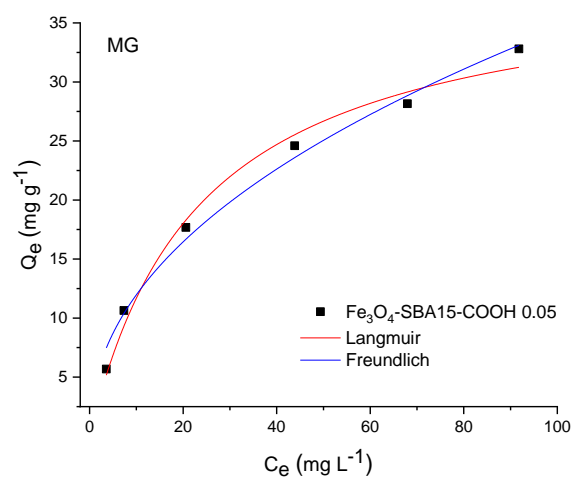

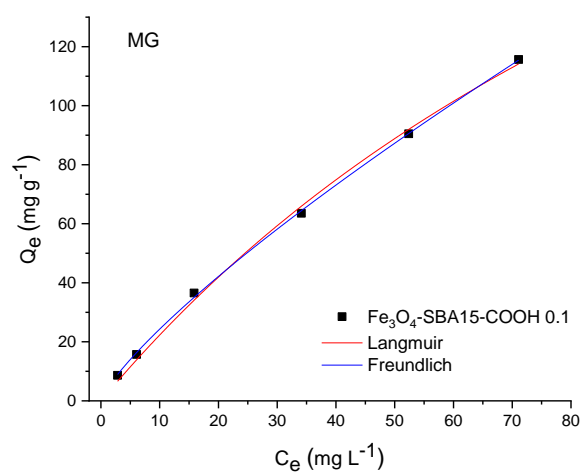

**Figure S4.** Equilibrium adsorption isotherms of MG on the magnetic adsorbents at pH = 10.6 and 298 K.
